# Supplementary material for: Prevalence of Cerebral Microbleeds in Patients With Continuous‐Flow Left Ventricular Assist Devices
Source: PubMed Central journal article supplement — J Am Heart Assoc. 2017 Sep 11;6(9):e005955. doi: 10.1161/JAHA.117.005955 (PMC5634264; doi:10.1161/jaha.117.005955), 2017-09-11
Supplement: JAH3-6-e005955-s001.pdf [file JAH3-6-e005955-s001.pdf]

# **SUPPLEMENTAL MATERIAL**

**Table S1.** Patients with hemorrhagic stroke during LVAD support

| patient | postoperative day | detail of hemorrhagic stroke                           | symptom                                     | prognosis     |
|---------|-------------------|--------------------------------------------------------|---------------------------------------------|---------------|
| 1       | 5                 | subarachnoid hemorrhage                                | headache                                    | full recovery |
| 2       | 650               | cerebral hemorrhage (left frontal lobe)                | headache                                    | full recovery |
| 3       | 921               | cerebellum hemorrhage (left)                           | headache, disturbance consciousness, ataxia | full recovery |
| 4       | 296               | left putamen hemorrhage                                | headache                                    | full recovery |
| 5       | 52                | cerebellum hemorrhage (right), subarachnoid hemorrhage | headache, disturbance consciousness         | full recovery |
| 6       | 100               | cerebral hemorrhage (right occipital lobe)             | headache                                    | full recovery |
| 7       | 550               | subarachnoid hemorrhage                                | headache                                    | full recovery |
| 8       | 669               | cerebellum hemorrhage (left)                           | headache, disturbance consciousness         | full recovery |
| 9       | 403               | subarachnoid hemorrhage                                | headache                                    | full recovery |
